# Supplementary material for: C-reactive protein to albumin ratio combined with the Systemic Inflammatory Response Index predicts the prognosis of patients undergoing radical hepatectomy
Source: Research Square preprint supplement (doi:10.21203/rs.3.rs-5924552/v1), 2025-02-04
Supplement: Supplementary file 1 [file 81b90be9728e8ee450e0feab.docx]

Supplementary Table 2 The results of multicollinearity analysis for factors with P < 0.1 in Univariate COX regression analysis

| Multicollinearity analysis | | |
| --- | --- | --- |
| Variables | tolerance | VIF |
| HBVDNA | 0.920 | 1.087 |
| PT | 0.910 | 1.098 |
| AFP | 0.901 | 1.110 |
| AST | 0.905 | 1.105 |
| Ascites | 0.912 | 1.096 |
| Tumor size | 0.776 | 1.289 |
| Macrovascular invasion | 0.864 | 1.157 |
| MVI | 0.887 | 1.127 |
| Edmondson–Steiner grading | 0.949 | 1.053 |
| CAR | 0.313 | 3.191 |
| PLR | 0.571 | 1.750 |
| MLR | 0.611 | 1.636 |
| NLR | 0.472 | 2.121 |
| SII | 0.393 | 2.547 |
| SIRI | 0.434 | 2.306 |
| PNI | 0.802 | 1.247 |
| mGPS | 0.306 | 3.263 |
| Dependent variable：status | | |
