# Supplementary material for: C-reactive protein to albumin ratio combined with the Systemic Inflammatory Response Index predicts the prognosis of patients undergoing radical hepatectomy
Source: Research Square preprint supplement (doi:10.21203/rs.3.rs-5924552/v1), 2025-02-04
Supplement: Supplementary file 2 [file b5416940bd9a02eb4a96c2ca.docx]

\

Supplementary Table 1: Definition and cut-offs of the I inflammatory indicators

| Inflammatory indicators | Score |
| --- | --- |
| CAR: C-reactive protein-Albumin Ratio |  |
| ＜0.105 | 0 |
| ≥0.105 | 1 |
| MLR: Monocytes-lymphocyte ratio |  |
| ＜0.245 | 0 |
| ≥0.245 | 1 |
| NLR: Neutrophil-Lymphocyte Ratio |  |
| ＜2.425 | 0 |
| ≥2.425 | 1 |
| PLR: Platelet-Lymphocyte Ratio |  |
| ＜146.5 | 0 |
| ≥146.5 | 1 |
| mGPS: The Modified Glasgow Prognostic Score |  |
| CRP≤10mg/L and ALB≥35g/L | 0 |
| CRP≤10mg/L and ALB＜35g/L | 0 |
| CRP＞10mg/L and ALB≥35g/L | 1 |
| CRP＞10mg/L and ALB＜35g/L | 2 |
| PNI: Prognostic Nutritional Index |  |
| Lymphocyte Count * 109/L * Albumin (g/L) ≥47.5 | 0 |
| Lymphocyte Count * 109/L * Albumin (g/L)＜47.5 | 1 |
| SII：Systemic Immune-Inflammation Index |  |
| Platelet*Neutrophil/Lymphocyte＜504.5, | 0 |
| Platelet*Neutrophil/Lymphocyte≥504.5, | 1 |
| SIRI: Systemic Immunoinflammatory Response Index |  |
| Neutrophil*Monocyte/Lymphocyte＜1.075 | 0 |
| Neutrophil*Monocyte/Lymphocyte≥1.075 | 1 |
