# Supplementary figures and images for: C-reactive protein to albumin ratio combined with the Systemic Inflammatory Response Index predicts the prognosis of patients undergoing radical hepatectomy
Source: Research Square preprint supplement (doi:10.21203/rs.3.rs-5924552/v1), 2025-02-04

A

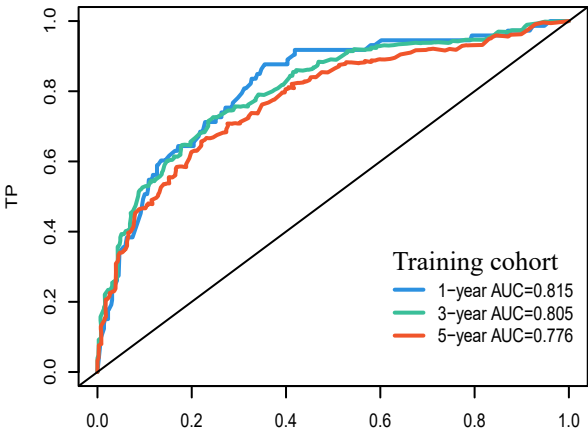

B

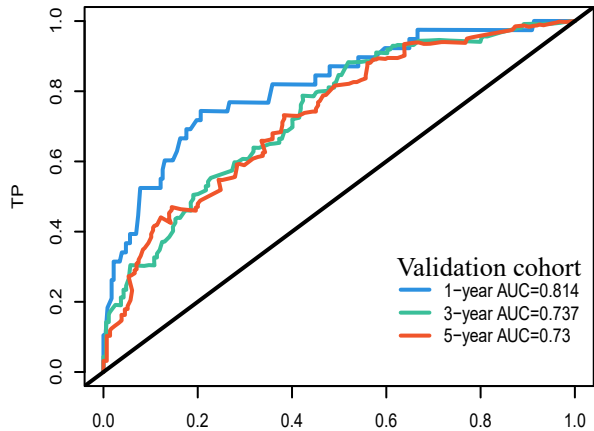

Supplement: Supplementary file 1 [file 98f0a93e1fb294d3f7ed169f.pdf]
